# Supplementary material for: Transient formation of multi-phase droplets caused by the addition of a folded protein into complex coacervates with an oppositely charged surface relative to the protein
Source: Royal Society of Chemistry journal article supplement (doi:10.1039/d2sm01422j), 2023-01-01
Supplement: d2sm01422j1.pdf [file d2sm01422j1.pdf]

## Supplementary Information

Transient formation of multi-phase droplets caused by  
the addition of a folded protein into complex coacervates with  
an oppositely charged surface relative to the protein

Nanako Sakakibara,<sup>a, b</sup> Tomoto Ura,<sup>a, b</sup> Tsutomu Mikawa,<sup>b</sup> Hiroka Sugai<sup>c,\*</sup> and Kentaro Shiraki<sup>a,\*</sup>

<sup>a</sup> Faculty of Pure and Applied Sciences, University of Tsukuba, 1-1-1 Tennodai, Tsukuba, Ibaraki 305-8573, Japan

<sup>b</sup> RIKEN Center for Biosystems Dynamics Research, 1-7-22 Suehiro-cho, Tsurumi-ku, Yokohama 230-0045, Japan

<sup>c</sup> Living Systems Materialogy (LiSM) Research Group, International Research Frontiers Initiative (IRFI), Tokyo Institute of Technology, 4259 Nagatsuta-cho, Midori-ku, Yokohama, Kanagawa 226-8501, Japan.

Corresponding Authors

\*Email: sugai.h.aa@m.titech.ac.jp

\*Email: shiraki.kentaro.gb@u.tsukuba.ac.jp

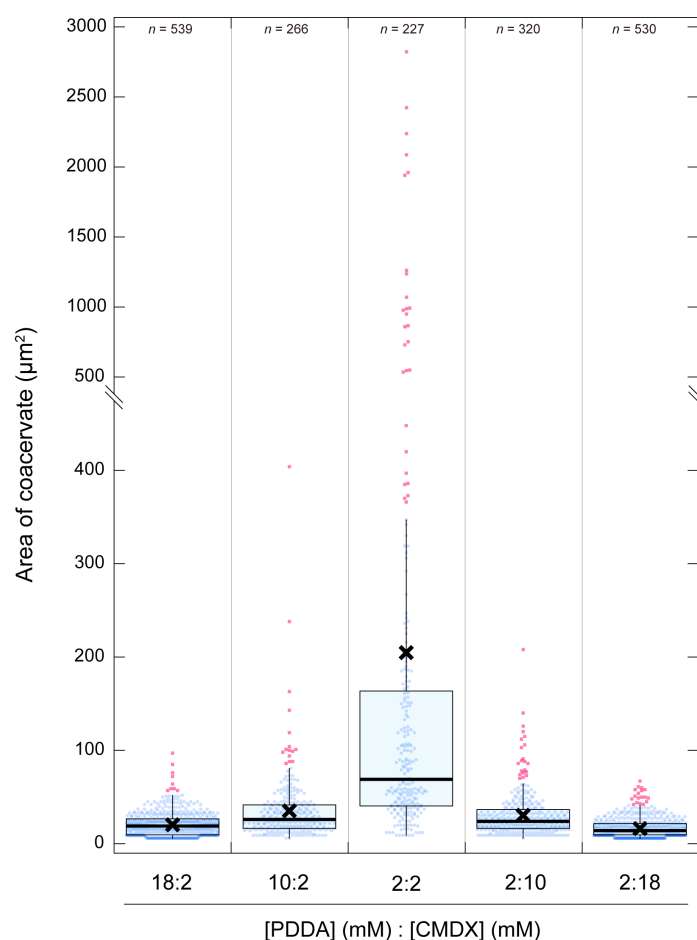

**Fig. S1** Box plot representing the area of the coacervates with the mean ( $\times$ ), median (horizontal bar), and outliers (dots) indicated. The areas of the PDDA/CMDX coacervates are calculated based on the microscopic images displayed in Fig. 2b. For Fig. 2b, the BF images were taken 1 h after all components were mixed. Although there were several large sized droplet outliers, as a rough trend, the droplet size tended to decrease as the PDDA:CMDX ratio deviated from stoichiometric conditions, i.e., [PDDA] (mM):[CMDX] (mM) = 2:2.

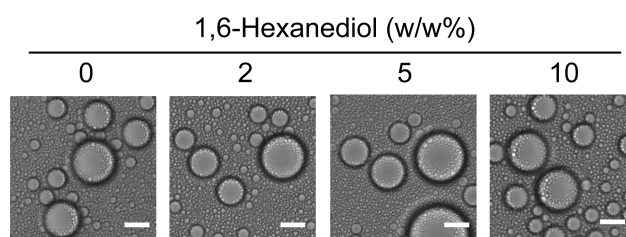

**Fig. S2** Dissolution of the coacervates ([PDDA] (mM):[CMDX] (mM) = 2:2) following addition of 1,6-hexanediol (0–10 w/w%). Scale bar: 10  $\mu$ m. The BF images were taken 1 h after all components were mixed.

(a) LYZ

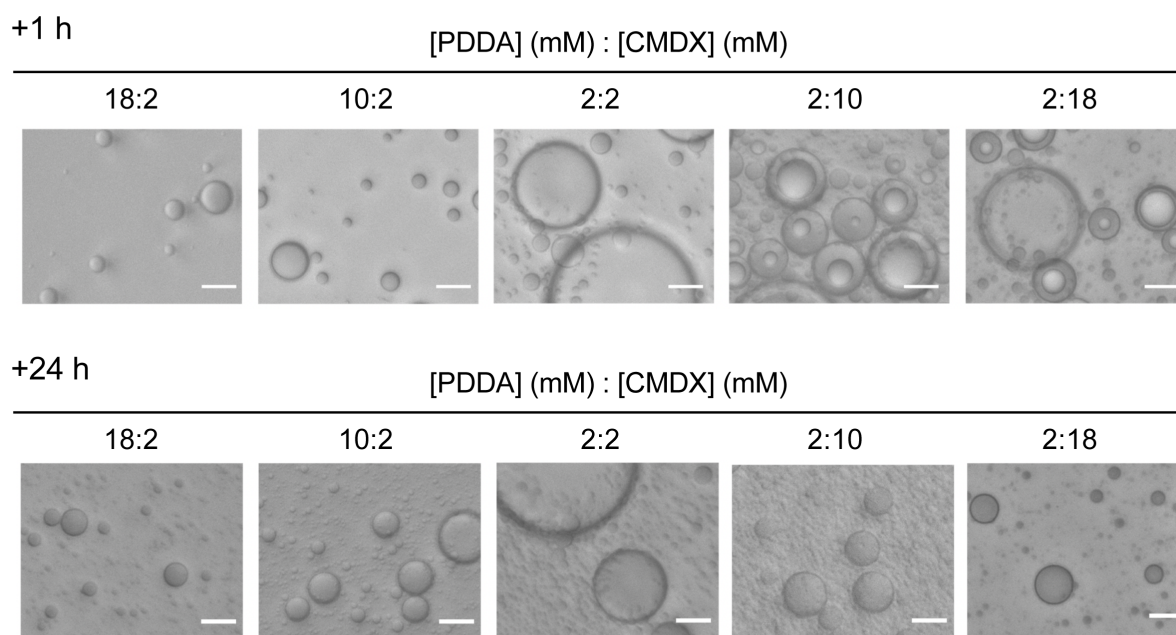

(b) OVA

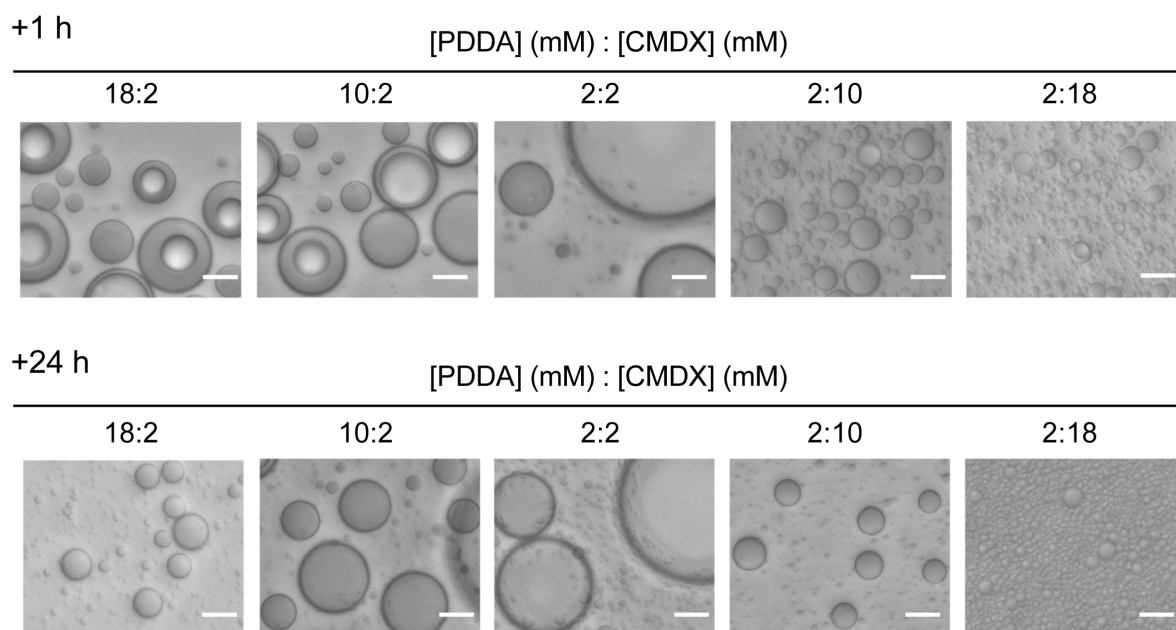

**Fig. S3** Bright-field optical microscopy images taken 1 h and 24 h after addition of the protein ((a) LYZ and (b) OVA) to the PDDA/CMDX coacervates. Samples contain polyelectrolytes (PDDA and CMDX; 18, 10, or 2 mM) and protein (LYZ or OVA; 1  $\mu$ M). Scale bar: 10  $\mu$ m.

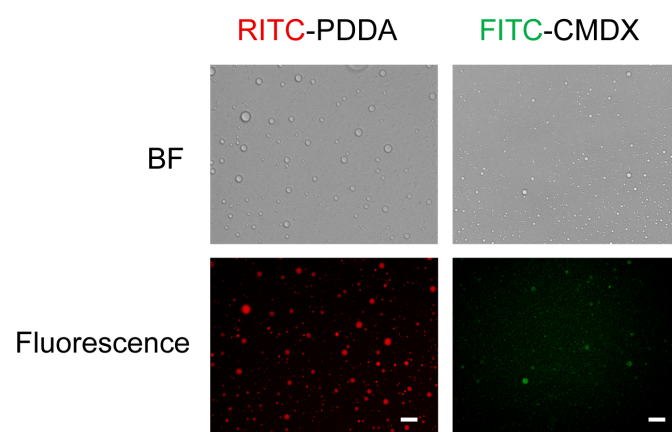

**Fig. S4** Bright-field and fluorescence microscopy images of the PDDA/CMDX coacervates ( $[PDDA]$  (mM): $[CMDX]$  (mM) = 10:2) with (a) 5% RITC-PDDA and (b) 5% FITC-CMDX. Scale bar: 10  $\mu$ m.



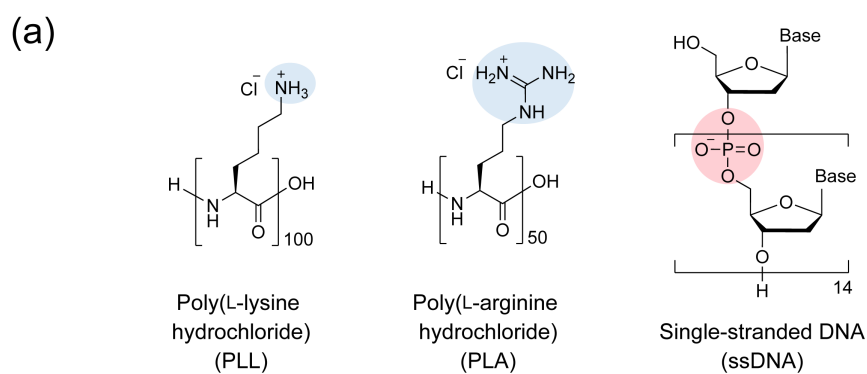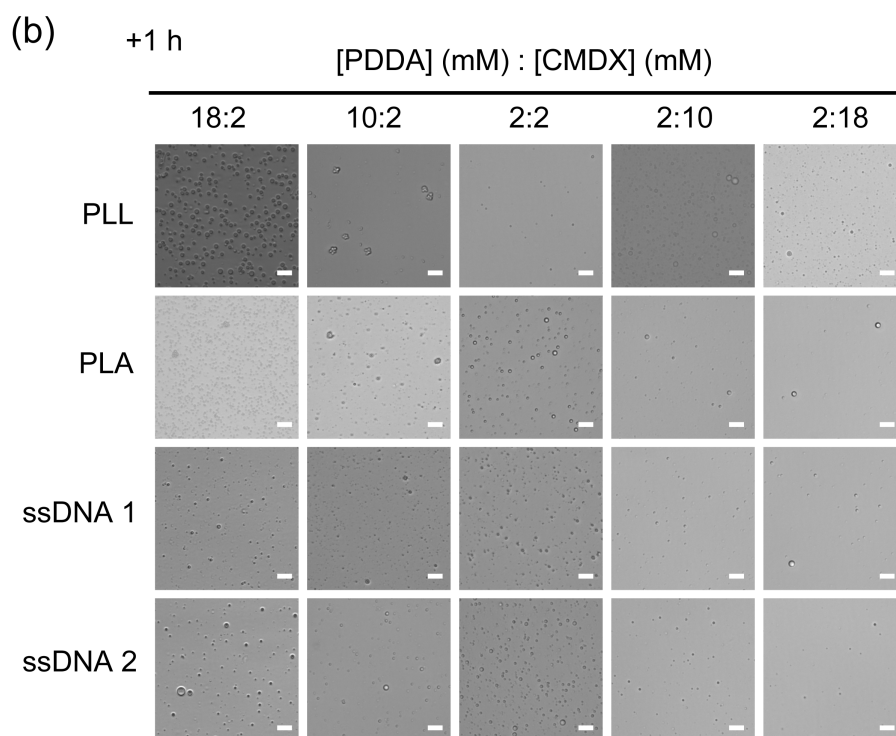

**Fig. S5** (a) Chemical structures of unfolded polymers used as client molecules. (b) Bright-field images taken 1 h after the addition of client molecules (PLL, PLA, and ssDNAs) into PDDA/CMDX complex coacervates. Scale bar: 10  $\mu$ m.

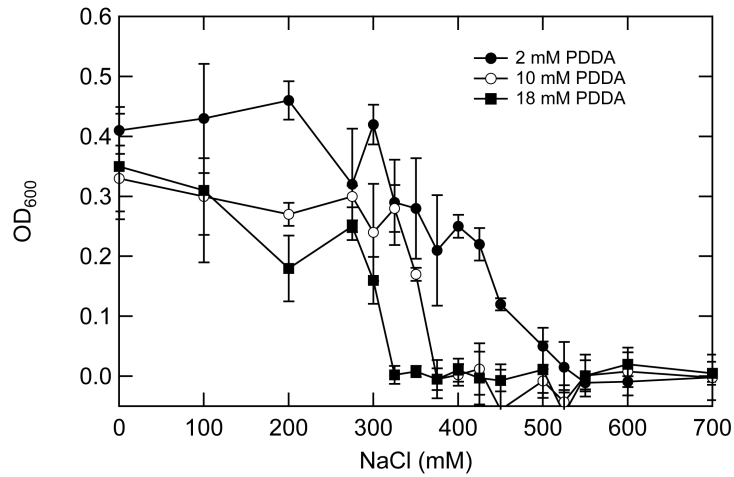

**Fig. S6** Effect of adding NaCl to the PDDA/POX mixtures on the optical density at 600 nm ( $OD_{600}$ ). Samples contain PDDA (18, 10, or 2 mM) and POX (1  $\mu$ M) in the presence of NaCl (0–700 mM).

(a) LYZ

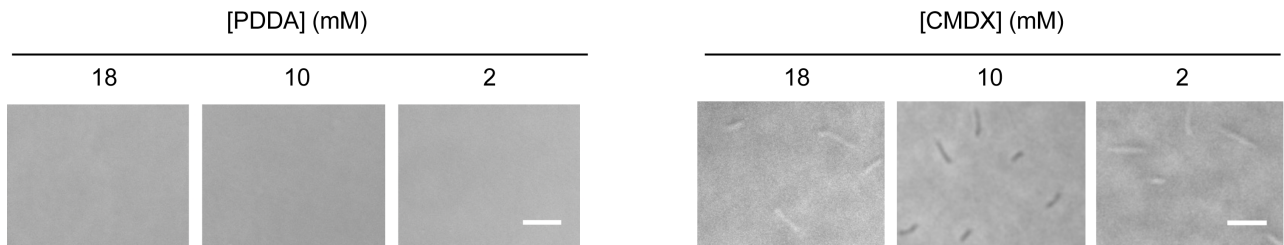

(b) OVA

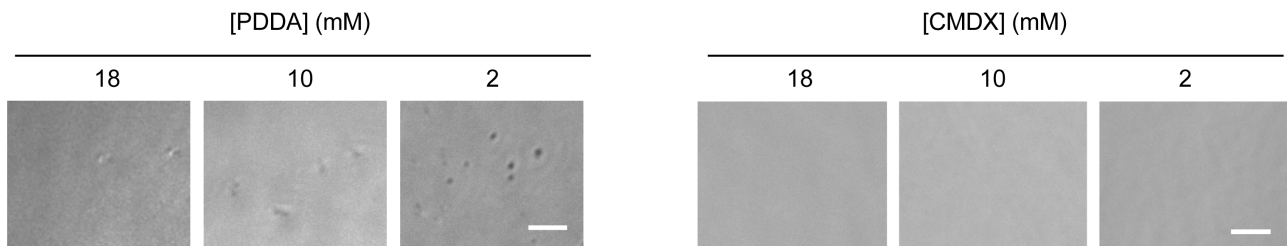

**Fig. S7** Bright-field microscopy images of the mixtures of proteins (a) LYZ and (b) OVA with the polyelectrolytes PDDA and CMDX. Samples contain polyelectrolyte (PDDA or CMDX ; 18, 10, or 2 mM) and protein (LYZ or OVA; 1  $\mu$ M). Scale bar: 10  $\mu$ m.

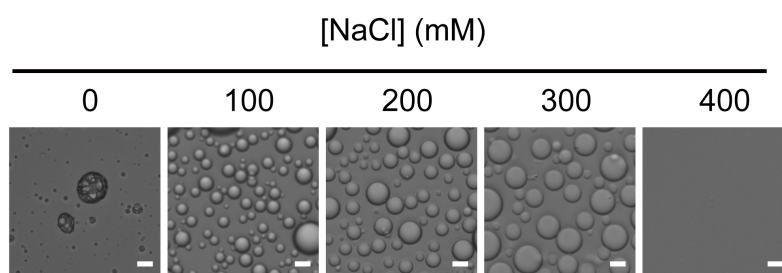

**Fig. S8** Effect of ionic strength on the formation of the multi-phase droplets. Bright-field images taken 1 h after the addition of LYZ into PDDA/CMDX complex coacervates ([PDDA]:[CMDX] = 2:10) containing NaCl (0, 100, 200, 300, and 400 mM). Scale bar: 10  $\mu$ m.

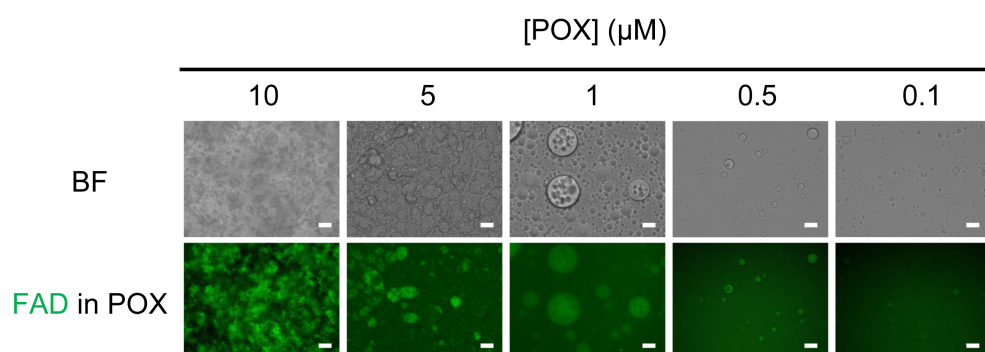

**Fig. S9** Effect of the protein concentration on the formation of the multi-phase droplets. Bright-field and fluorescence images taken 1 h after the addition of POX into PDDA/CMDX complex coacervates ([PDDA]:[CMDX] = 10:2). Scale bar: 10  $\mu$ m.
